# Supplementary material for: Serine Proteinases in Leishmania (Viannia) braziliensis Promastigotes Have Distinct Subcellular Distributions and Expression
Source: MDPI journal article supplement (doi:10.3390/ijms20061315), 2019-03-15
Supplement: s1 [file s1]

## Supplementary material

|              |      |                                                                                    |      |                                      |
|--------------|------|------------------------------------------------------------------------------------|------|--------------------------------------|
| Lbrm.13.0860 | 1    | -----*DTGLCAGITERSRNSVTCTSVVPG-----*VACEDAGCAHGTRSVSVLAG-----                      | 44   |                                      |
| Lbrm.28.2570 | 641  | VFPSDLVHIPAVYVERSAACWSGMCDALGLDSHNS--CGEVIPPRVRDLKRESTISAVEANAFADRWRREVGMRMGVETTSN | 718  |                                      |
| Lbrm.13.0860 | 45   | -----QLSVSPPLDREPPE---ETAWRSSGRHILSAGQYIGLAPGATVRVFRVDRQGRTHQRYL-----ARAL          | 105  |                                      |
| Lbrm.28.2570 | 719  | NRNAELVPLVVRSAVRAQDPTMLVNTCARVSG-DTTNGGAAAGAGTEASPRATGGPSGMGLRKLRWRWAHRTDLRRARCC   | 797  | Intracellular region of Lbrm.28.2570 |
| Lbrm.13.0860 | 106  | GVLLREAEDSEVGRLNRTWDTPSAHIARRDETVDVINLSYGSEDYYSNSQVQSKLYRLMHEHGVVVAASGNDGVRFGSV    | 185  |                                      |
| Lbrm.28.2570 | 798  | GVFGRVMGETAEQRMRR-----LMARKVKREGYSLFERFLHYYLPAIYCARYALLALLVLFIIVC-----VLGSR        | 864  |                                      |
| Lbrm.13.0860 | 186  | RSPADMPGVLAVGALRVEG-----HGRTAQTSR---TLDTNAQGNPAAGALGDLADSFAAGGGHK                  | 242  |                                      |
| Lbrm.28.2570 | 865  | ITAAGLPNTLLADQGNIAINTFAEMGDTFGQRGSCFCGPYYRSPQDYRQATVTDITACSAEYDVQMILYADSCGVNCGTS   | 944  |                                      |
| Lbrm.13.0860 | 243  | *SVAHFSGRGPTTWELPFAGRAKPDVLALGQHWTVQGVSAAAFSTAAPQR--RRAAPALQRSASGTSIAAPIVAGVVA     | 320  |                                      |
| Lbrm.28.2570 | 945  | ACVDCACTAHGTAALDDCGG-----CTVAELSGAAKCTCPVTRDCQYCAWALDKGNTGGGSCSMTNASTCG            | 1011 | Extracellular region of Lbrm.28.2570 |
| Lbrm.13.0860 | 321  | LCLEAAWSSASAAAMKNTTDDGAYLDVRHNRRLARVSDSLLVREAILRTA-----                            | 370  |                                      |
| Lbrm.28.2570 | 1012 | SNGGCDQYSGTCVCHAGFTGATCGECEAWLLPITWNSACTLECSASMNSAACSCNVSSGRCQTCPAGTRGYDCSWPSVDC   | 1091 |                                      |

Figure S1. Comparative sequential analysis of the S8 domain of the LbrM.13.0860 and LbrM.28.2570 genes. Sequence analysis was performed on the BLAST server (<https://blast.ncbi.nlm.nih.gov>). In the figure is shown the alignment of the region corresponding to the S8 domain based on the amino acid residues of the catalytic site (\*) of the LbrM.13.0860 gene. In the Lbrm28.2570 gene, amino acid residues with potential for active site formation can be detected in the intracellular and extracellular regions: Aspartic (D), Asparagine (N), Histidine (H) and Serine (S).
